# Supplementary material
Source: PubMed Central journal article supplement (PMC2852977)

A

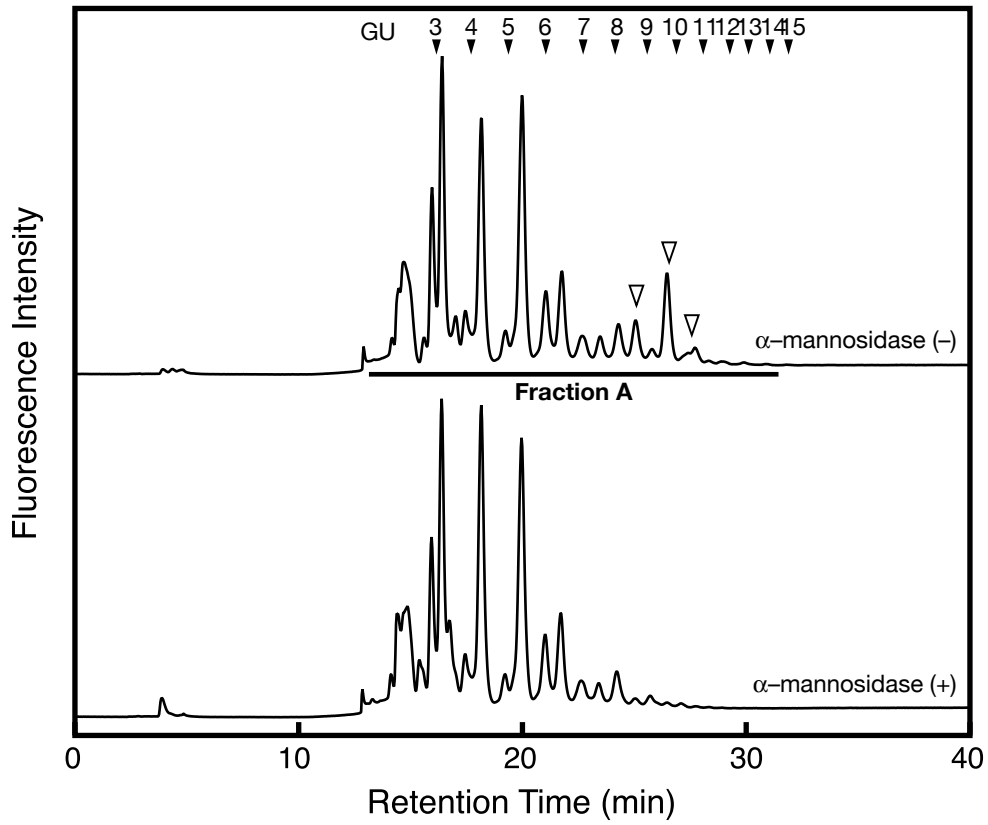

B

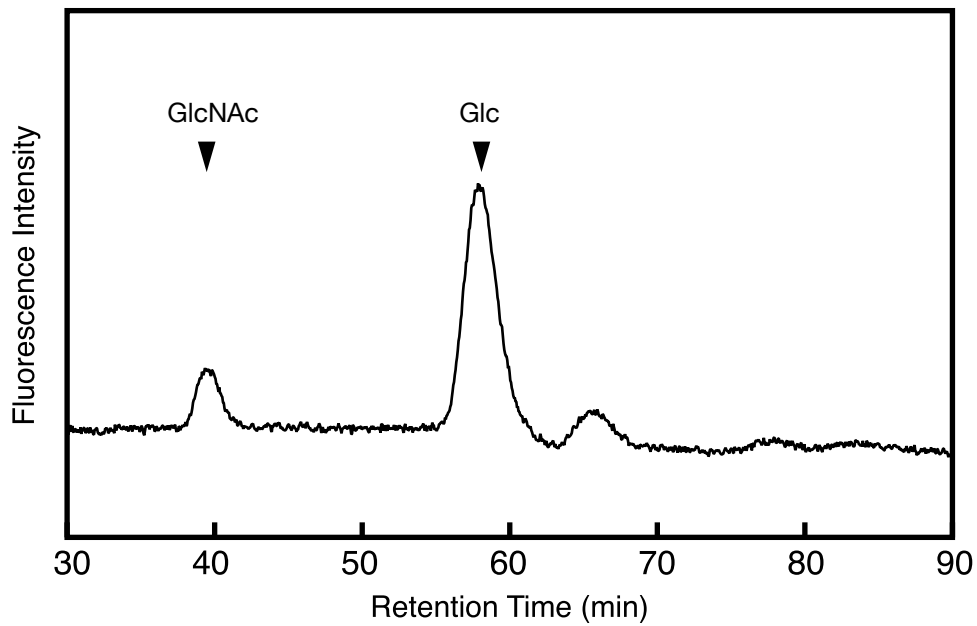

Supplemental figure 1, Hirayama *et al.*

Supplement: supp_M109.082081_jbc.M109.082081-1.pdf [file supp_M109.082081_jbc.M109.082081-1.pdf]

# A

*Neurospora crassa* Neg1: endo-1,6- $\beta$ -glucanase

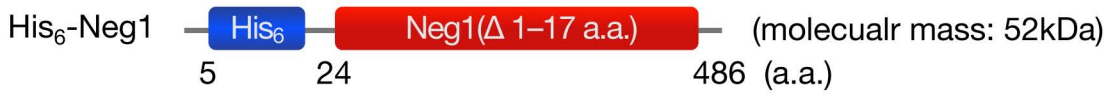

# B

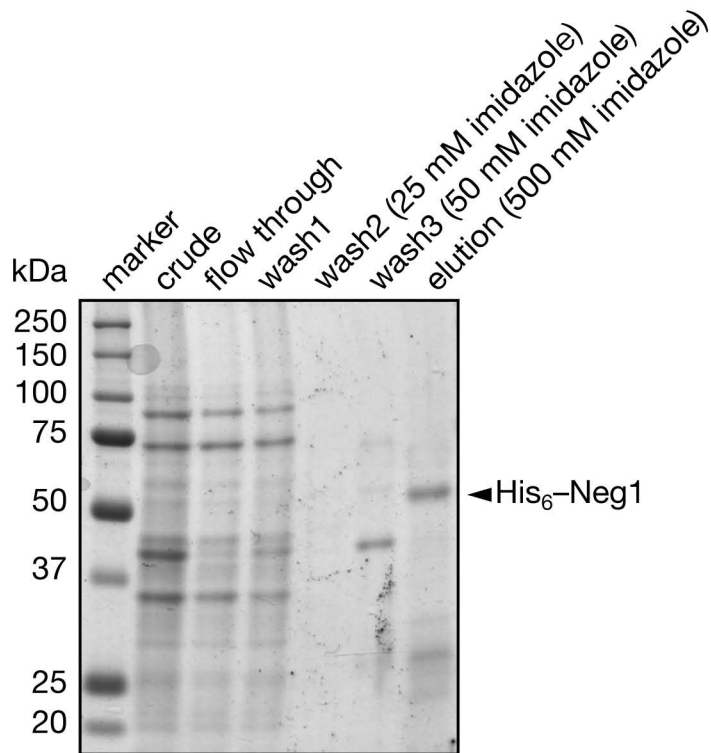

Supplement: supp_M109.082081_jbc.M109.082081-2.pdf [file supp_M109.082081_jbc.M109.082081-2.pdf]

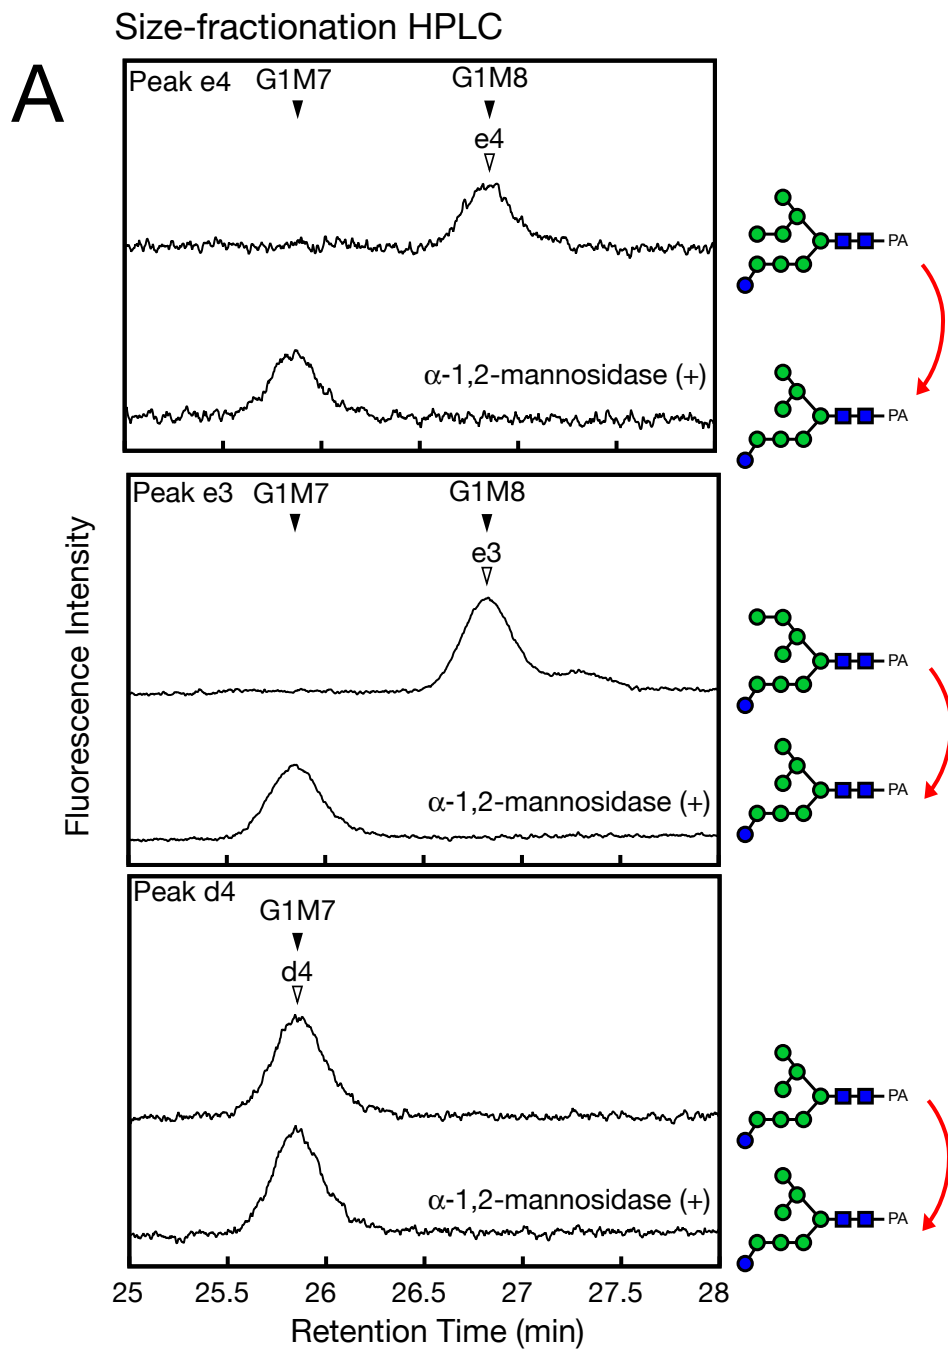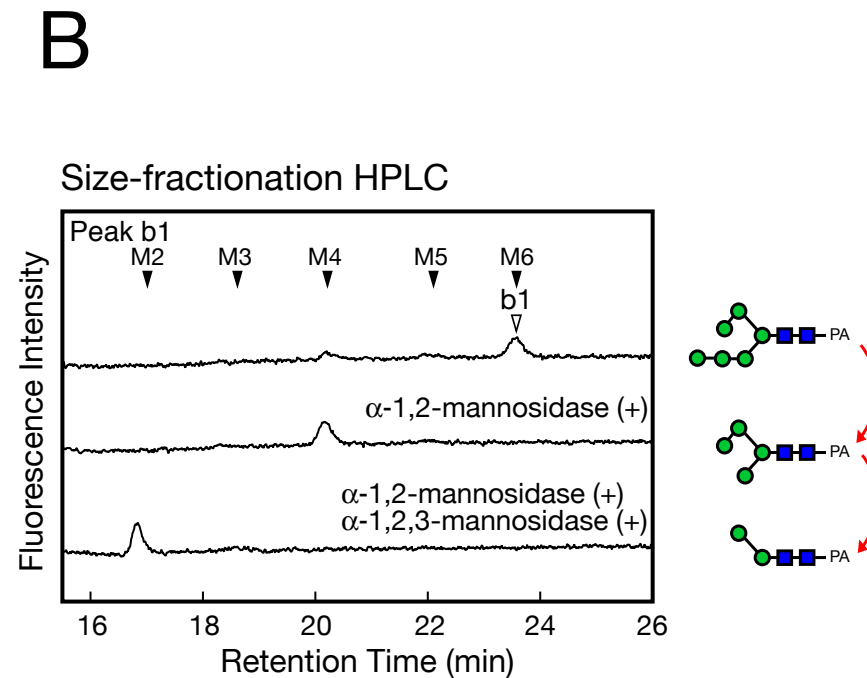

Supplemental figure 3, Hirayama *et al.*

Supplement: supp_M109.082081_jbc.M109.082081-3.pdf [file supp_M109.082081_jbc.M109.082081-3.pdf]
